# Supplementary material for: A Transcriptomic Analysis of Tobacco Leaf with the Functional Loss of the Plastid rpoB Operon Caused by TALEN-Mediated Double-Strand Breakage
Source: MDPI journal article supplement (doi:10.3390/plants11212860), 2022-10-26
Supplement: s1 [file s1]

Supplementary Table S1. The primers used in this study.

| Name             | Sequence (5' to 3')       | Purpose                                                                                  |
|------------------|---------------------------|------------------------------------------------------------------------------------------|
| cox1-F           | GGACGGTCTATCCGCCCTTA      | qPCR assay for mitochondrial <i>cox1</i> gene                                            |
| cox1-R           | GTCACTAGAACGGACCACACAAA   | qPCR assay for mitochondrial <i>cox1</i> gene                                            |
| rpl16-F          | TTCTGCGGAAGTATCTACTCGTT   | qPCR assay for mitochondrial <i>rpl16</i> gene                                           |
| rpl16-R          | GCGCTGCTTCAATGGCTC        | qPCR assay for mitochondrial <i>rpl16</i> gene                                           |
| RpoT1-F          | TGTGATGAAGGGAAGAACCGC     | qRT-PCR assay for nuclear <i>rpoT1</i> gene                                              |
| RpoT1-R          | GTGTTTCTTCCAAGTCACCACTCA  | qRT-PCR assay for nuclear <i>rpoT1</i> gene                                              |
| RpoT2-F          | AAAGCAGCTTATGCTAAGTACTTGT | qRT-PCR assay for nuclear <i>rpoT2</i> gene                                              |
| RpoT2-R          | CTTCCTTTTGCTTGTCTTTCTCG   | qRT-PCR assay for nuclear <i>rpoT2</i> gene                                              |
| RpoT3-F          | GCAGAACGCTGAGACGACCGT     | qRT-PCR assay for nuclear <i>rpoT3</i> gene                                              |
| RpoT3-R          | TGACTTTGAGCTCCAGTCATATGTT | qRT-PCR assay for nuclear <i>rpoT3</i> gene                                              |
| EF-1 $\alpha$ -F | GGTAGGATACAACCCTGATAAAATC | qPCR and qRT-PCR assays for nuclear <i>EF-1<math>\alpha</math></i> gene as normalization |
| EF-1 $\alpha$ -R | CAGTGGGACCAAAAGTCACAAC    | qPCR and qRT-PCR assays for nuclear <i>EF-1<math>\alpha</math></i> gene as normalization |

Supplementary Table S2. The statistics of RNA-Seq reads mapped to reference cpDNA template.

| Library | SRA number  | NGS methods | Total reads | Total number of bases | Mapped reads <sup>a</sup> |                     |                |                 |                     |          |
|---------|-------------|-------------|-------------|-----------------------|---------------------------|---------------------|----------------|-----------------|---------------------|----------|
|         |             |             |             |                       | Counts                    | Percentage of reads | Average length | Number of bases | Percentage of bases | Coverage |
| WT      | SRR12417980 | Illumina    | 48,082,362  | 7,212,354,300         | 21,573,633                | 44.87%              | 150            | 3,236,044,950   | 44.87%              | 20,743   |
| M0      | SRR12418005 | Illumina    | 49,399,502  | 7,409,925,300         | 10,524,931                | 21.31%              | 150            | 1,578,739,650   | 21.31%              | 10,119   |

<sup>a</sup>The RNA-Seq reads were mapped to tobacco cpDNA (accession no. NC\_001879) using CLC Genomics Workbench 10 with the parameters of length fraction (L) 1.0 and similarity (S) 0.98.

Supplementary Table S3. The statistics of RNA-Seq libraries mapped to reference mtDNA template.

| Library | SRA number  | NGS methods | Total reads | Total number of bases | Mapped reads <sup>a</sup> |                     |                |                 |                     | Coverage |
|---------|-------------|-------------|-------------|-----------------------|---------------------------|---------------------|----------------|-----------------|---------------------|----------|
|         |             |             |             |                       | Counts                    | Percentage of reads | Average length | Number of bases | Percentage of bases |          |
| WT      | SRR12417980 | Illumina    | 48,082,362  | 7,212,354,300         | 1,605,923                 | 3.34%               | 150            | 240,888,450     | 3.34%               | 559.09   |
| M0      | SRR12418005 | Illumina    | 49,399,502  | 7,409,925,300         | 2,719,418                 | 5.50%               | 150            | 407,912,700     | 5.50%               | 946.85   |

<sup>a</sup>The RNA-Seq reads were mapped to tobacco mtDNA (accession no. NC\_006581) using CLC Genomics Workbench 10 with the parameters of length fraction (L) 1.0 and similarity (S) 0.98.

Supplementary Table S4. The statistics of DNA-Seq libraries mapped to reference mtDNA template.

| Library           | SRA number  | NGS methods | Total reads | Total number of bases | Mapped reads <sup>a</sup> |                     |                |                 |                     |          |
|-------------------|-------------|-------------|-------------|-----------------------|---------------------------|---------------------|----------------|-----------------|---------------------|----------|
|                   |             |             |             |                       | Counts                    | Percentage of reads | Average length | Number of bases | Percentage of bases | Coverage |
| TN90 <sup>b</sup> | SRR955758   | Illumina    | 310,625,638 | 31,373,189,438        | 656,593                   | 0.21%               | 101            | 66,315,893      | 0.21%               | 154.01   |
| M8                | SRR12407060 | Illumina    | 271,083,958 | 40,933,677,658        | 469,811                   | 0.17%               | 151            | 70,941,461      | 0.17%               | 164.75   |
| M0                | SRR12407063 | Illumina    | 224,754,856 | 33,937,983,256        | 1,885,143                 | 0.84%               | 151            | 284,656,593     | 0.84%               | 661.07   |
| M17               | SRR12407106 | Illumina    | 237,951,144 | 35,930,622,744        | 680,191                   | 0.29%               | 151            | 102,708,841     | 0.29%               | 238.53   |
| M29               | SRR12407170 | Illumina    | 243,115,774 | 36,710,481,874        | 519,664                   | 0.21%               | 151            | 78,469,264      | 0.21%               | 182.23   |

<sup>a</sup>The DNA-Seq reads were mapped to tobacco mtDNA (accession no. NC\_006581) using CLC Genomics Workbench 10 with the parameters of length fraction (L) 1.0 and similarity (S) 1.0.

<sup>b</sup>TN90, the DNA-Seq reads of untransformed tobacco cultivar TN90 (Sierro et al., 2014) retrieved from NCBI database was used as control.

## Supplementary Figure S1

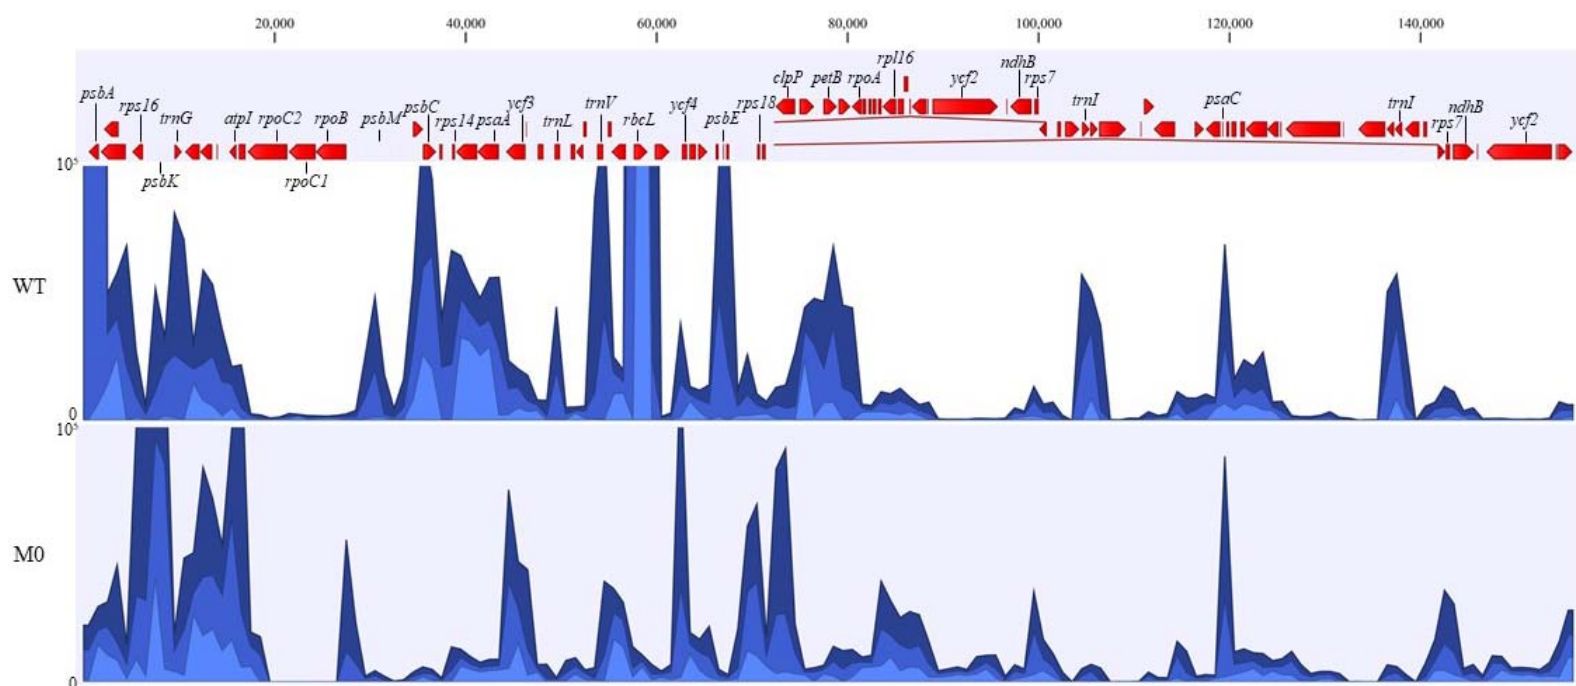

**Supplementary Figure S1. The distribution pattern and coverage of RNA-Seq reads by mapping to the tobacco cpDNA template between PEP-deficient tobacco and wild-type plants.**

(A) The RNA-Seq reads from PEP-deficient (M0) tobacco and wild-type (WT) plants were mapped to the cpDNA template (NC\_001879) by using CLC Genomic Workbench 10 with the high stringent parameters of length fraction 1.0 and similarity 0.98. The detailed mapping statistics of RNA-Seq reads to cpDNA were shown in Supplementary Table 2. The X-axis (top) represents the tobacco cpDNA, and the location of genes were indicated in red color. The Y-axis represents the depth of coverage (altitude of blue color) with the fixed maximum of coverage at  $1 \times 10^5$ . The arrowhead indicates the direction of transcription.

## Supplementary Figure S2

A.

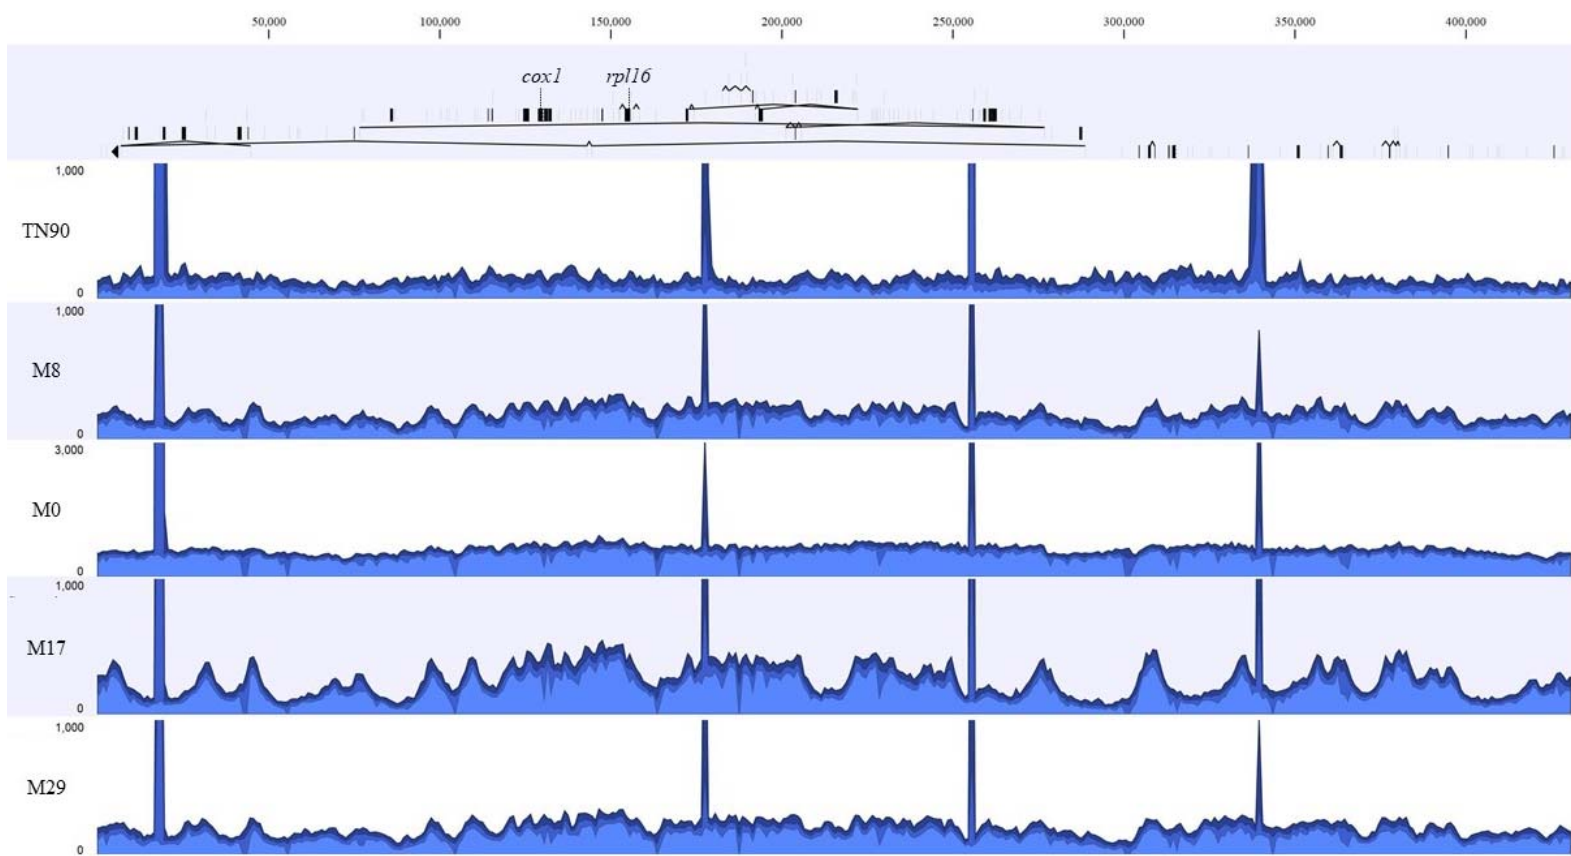

**Supplementary Figure S2. The distribution pattern and nucleotide coverage of DNA-Seq reads mapped to the tobacco mtDNA among transgenic plants.**

DNA-Seq reads from transgenic M8, M0, M17, M29 and untransformed TN90 plants were mapped to the mtDNA template (NC\_006581) by using CLC Genomic Workbench 10 with the most stringent parameters of length fraction (L) 1.0 and similarity (S) 1.0. The detailed mapping statistics of DNA-Seq reads to mtDNA are listed in Supplementary Table 4. The distribution pattern of DNA-Seq reads (blue color) mapped to mtDNA are shown. The number (in bp) on the top of the X-axis is the ruler of mtDNA. The distribution of genes (black) and the direction of transcription (arrow head) in mtDNA with the *cox1* and *rpl16* genes indicated. Note, The Y-axis (depth of nucleotide coverage) was not in the same scale between M0 (3,000) and the other plants (1,000).

## Supplementary Figure S3

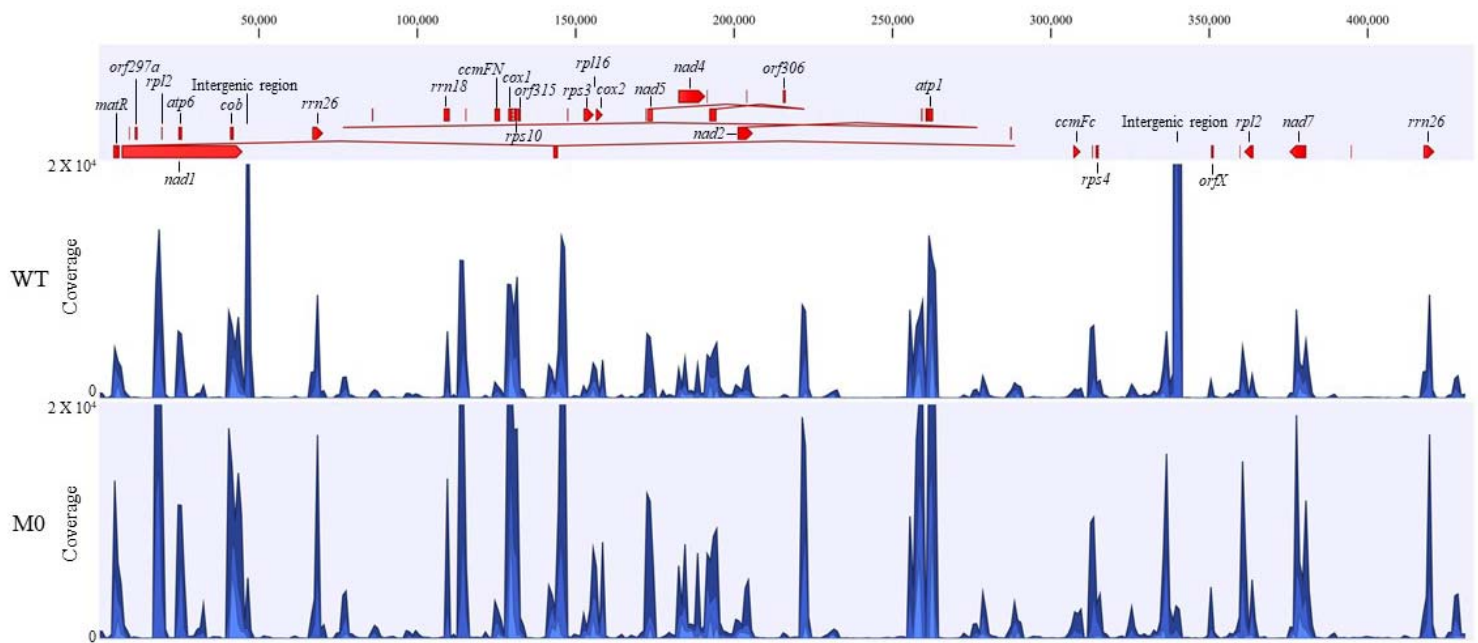

**Supplementary Figure S3. The distribution pattern and coverage of RNA-Seq reads by mapping to the tobacco mtDNA template between PEP-deficient tobacco and wild-type plants.**

(A) The RNA-Seq reads from PEP-deficient (M0) tobacco and wild-type (WT) plants were mapped to the mtDNA (NC\_006581) template by using CLC Genomic Workbench 10 with the high stringent parameters of length fraction 1.0 and similarity 0.98. The detailed mapping statistics of RNA-Seq reads to mtDNA were shown in Supplementary Table 3. The X-axis (top) represents the tobacco mtDNA, and the location of genes were indicated in red color. The Y-axis represents the depth of coverage (altitude of blue color) with the fixed maximum of coverage at  $2 \times 10^4$ . The arrowhead indicates the direction of transcription.

#### Supplementary Figure S4

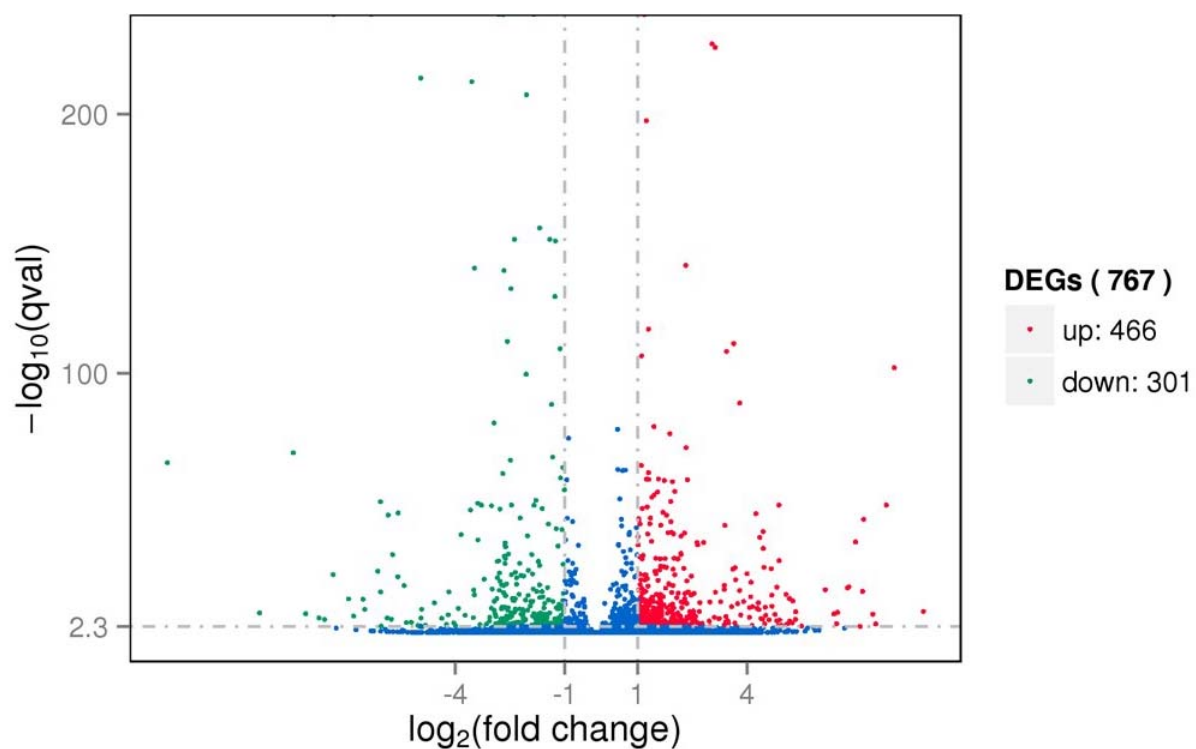

#### Supplementary Figure S4. The differentially expressed genes (DEGs) between PEP-deficient tobacco and wild-type plants.

The x-axis shows the fold change in gene expression between PEP-deficient (M0) tobacco and wild-type (WT) plants. The y-axis shows the statistical significance of the difference in gene expression. The significantly up- and down-regulated genes are highlighted in red and green, respectively. The genes that did not express a significant difference between samples are in blue. The threshold was set as an absolute value of log<sub>2</sub> fold changes (FC)  $\geq 1$  and a q-value (qval)  $\leq 0.005$ . The q-value is the p value after normalization.



**Supplementary Figure S5.**

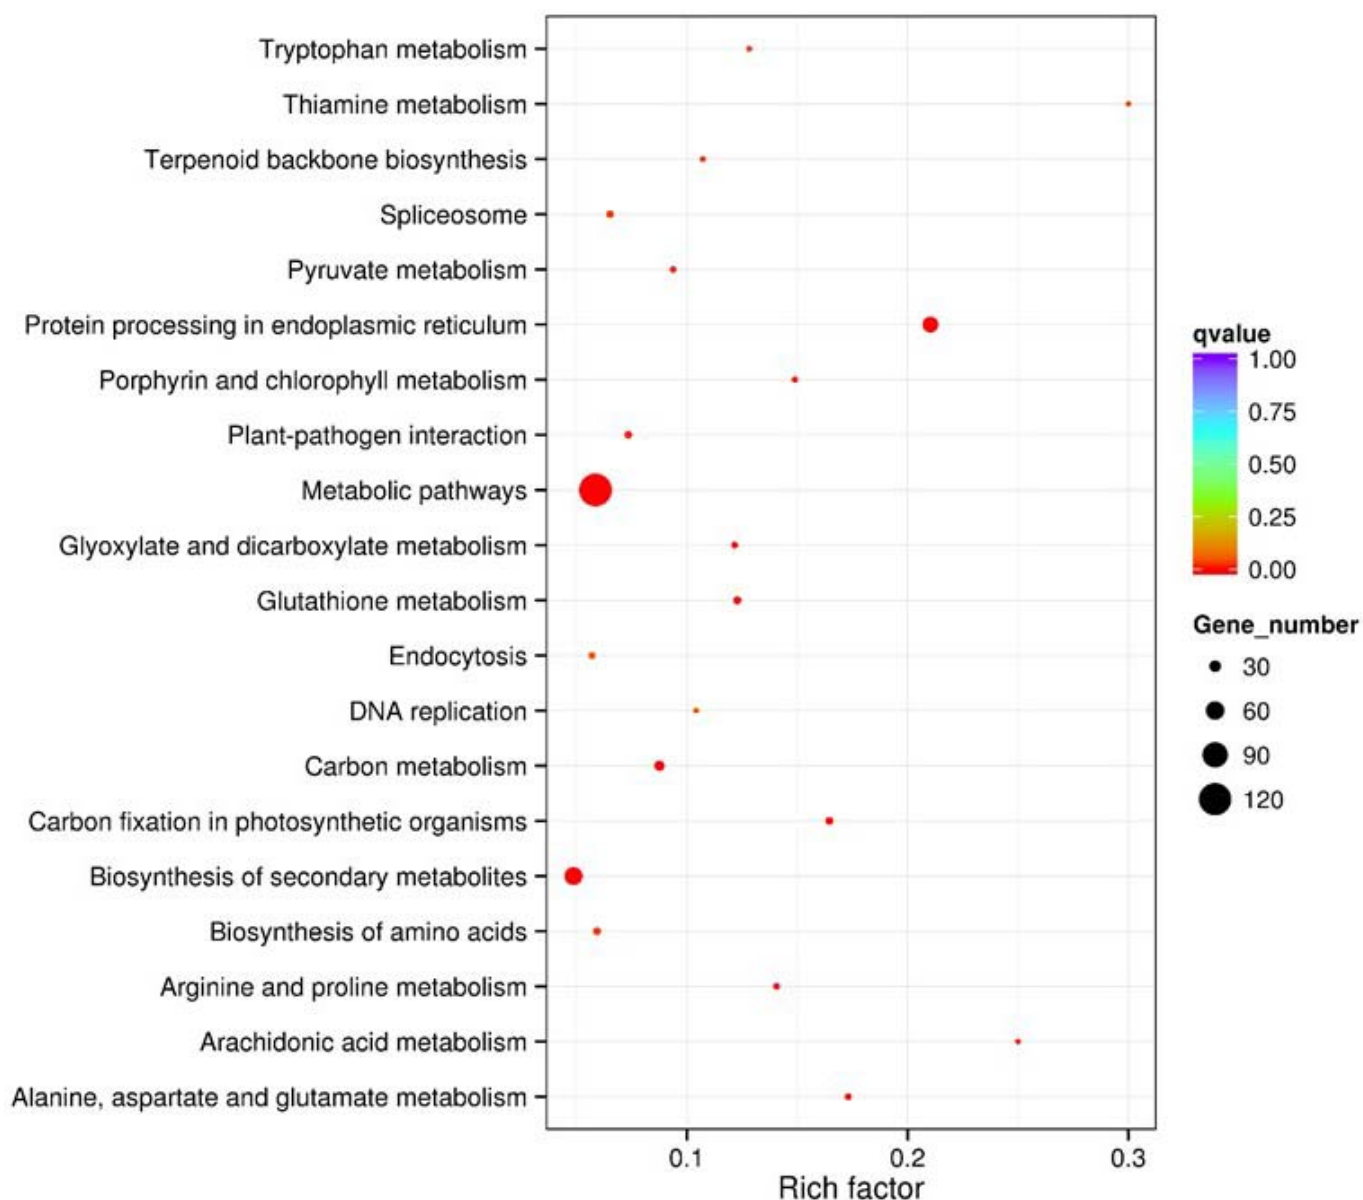

**Supplementary Figure S5. The KEGG pathway enrichment analysis for the differentially expressed genes (DEGs) between PEP-deficient tobacco and wild-type plants.**

The top 20 most significant enriched pathways (y-axis) were selected in KEGG scattered plot. The rich factor (x-axis) is the ratio of DEGs counts to the particular pathway over the annotated genes counts in the same pathway. The dot size represents the number of different genes and the color indicates the q-value (p value after normalization)
